# Supplementary material
Source: Research Square preprint supplement (doi:10.21203/rs.3.rs-9880078/v1)
Supplement: Supplementary file 1 [file dc5193a2ea4f5dd664d0b0fa.docx]

**ELECTRONIC SUPPLEMENTARY MATERIAL**

*Time-Varying Monetary–Fiscal Policy Interaction and Inflation Dynamics: Evidence from Indonesia using a TVP-VAR-SV Approach*

**This supplementary material contains the following figures:**

• Figure S1. Scatter Matrix and Correlation Heatmap

• Figure S2. Sup-Wald parameter stability test

• Figure S3. Sup-Wald Parameter Stability Test

• Figure S4. TV-FEVD Credible Bands – Respons CPI (t = 2012Q3)

• Figure S5. Volatility Heatmap – All Variables

• Figure S6. Verifikasi Historical Decomposition (Actual vs HD Total)

• Figure S7. Residual Diagnostics TVP-VAR-SV

**
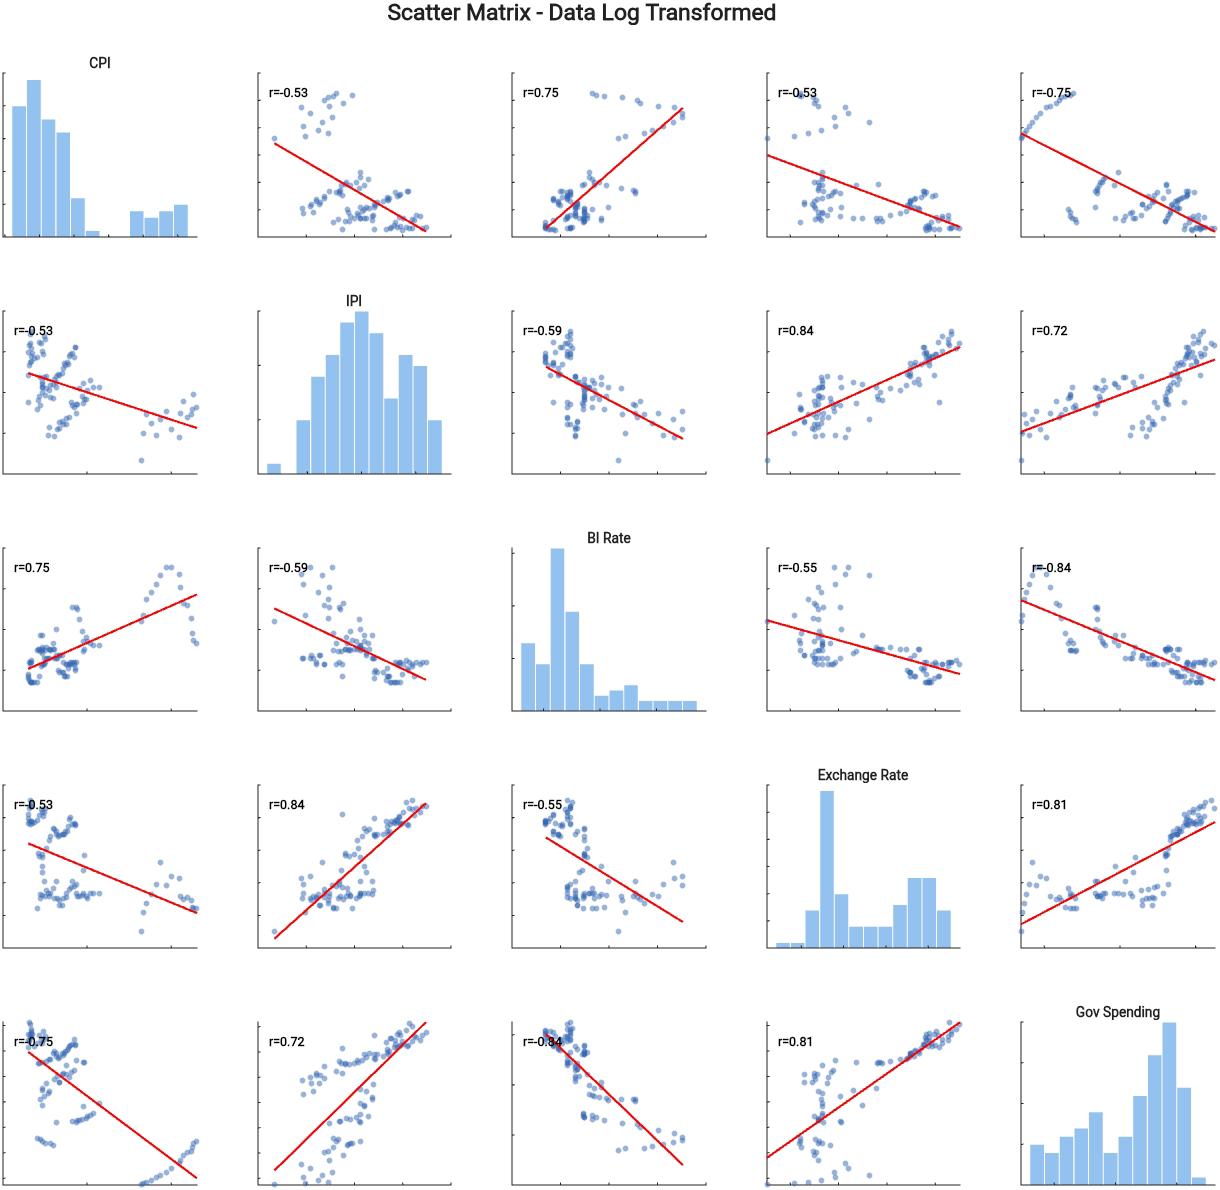
Figure S1. Scatter Matrix and Correlation Heatmap**


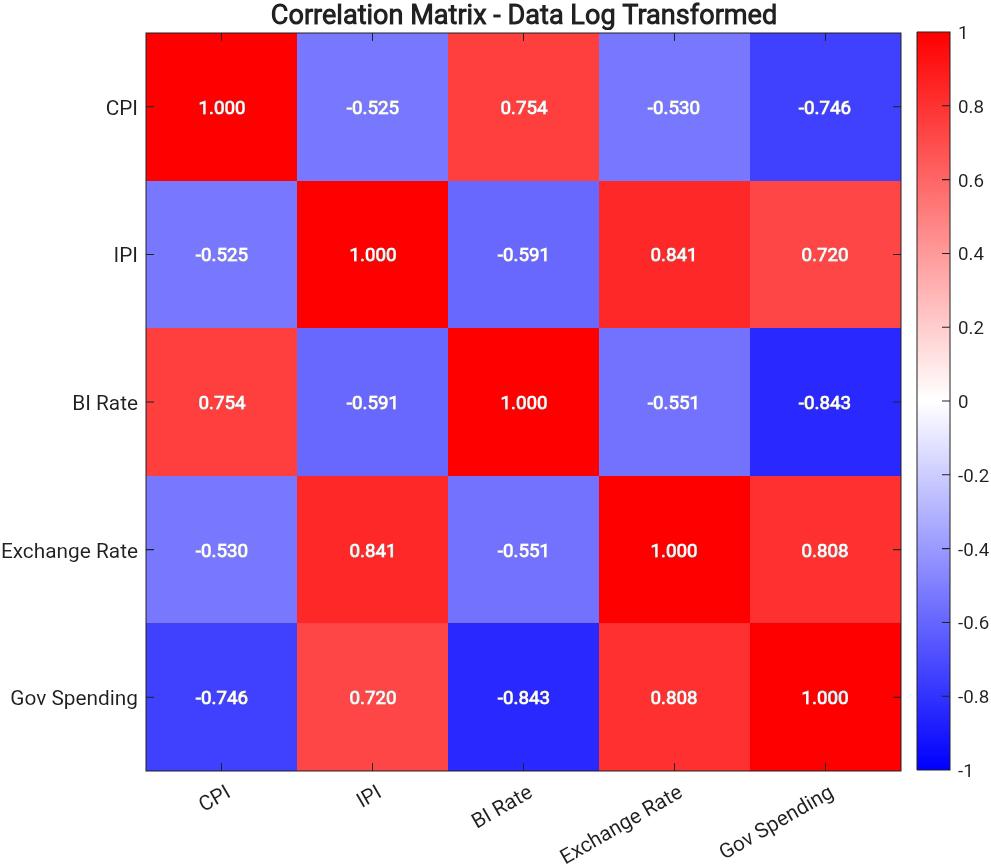


*Figure S1. Scatter matrix dan correlation heatmap variabel dalam transformasi log. Angka pada setiap panel menunjukkan koefisien korelasi Pearson; semua korelasi signifikan pada tingkat 1% (***).*

***Catatan:*** *Sumber: diolah dari FRED dan Bank Indonesia.*

**Figure S2. Sup-Wald parameter stability test...**


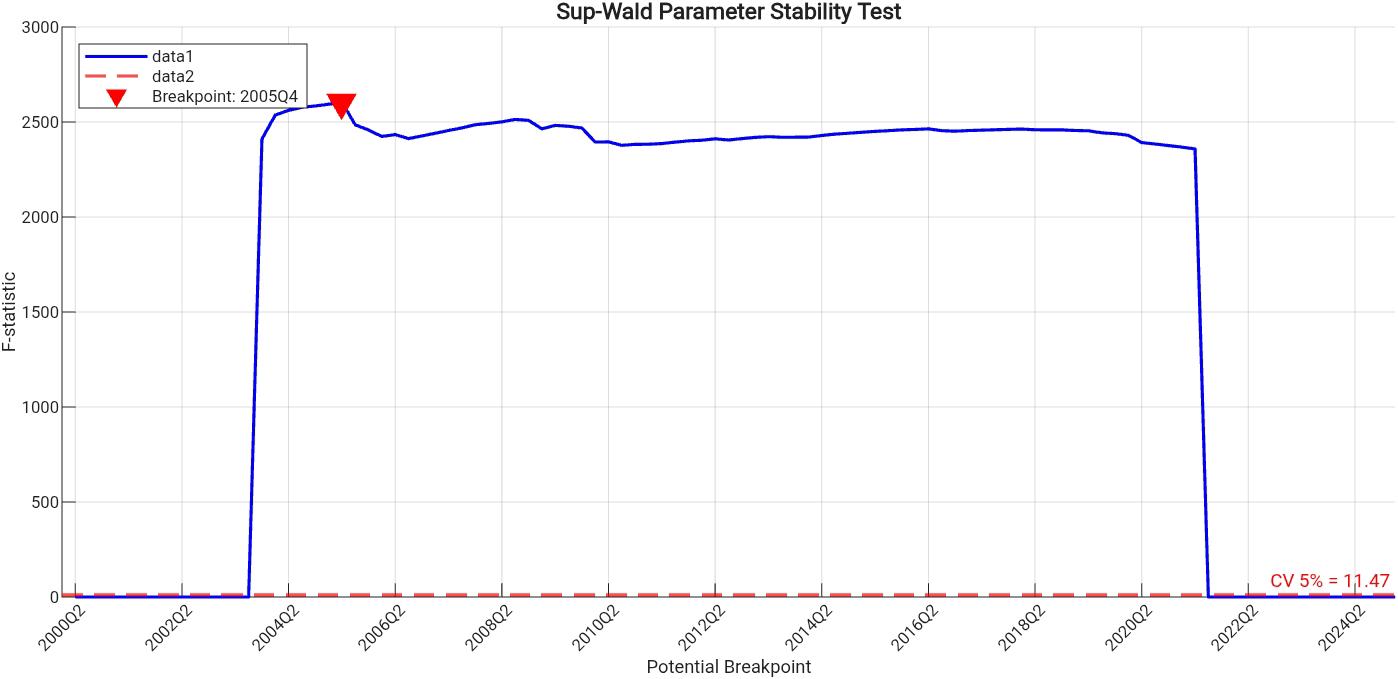


*Figure S2. Sup-Wald parameter stability test. F-statistic = 2604.59 with a potential breakpoint at 2005Q4, far exceeding the 5% critical value of 11.47, confirming parameter instability that justifies the use of TVP-VAR-SV.*

***Note****: H0: parameters are stable throughout the sample period. Rejection of H0 confirms the need for a time-varying approach.*

**Figure S3. IRF CPI pre vs post krisis...**


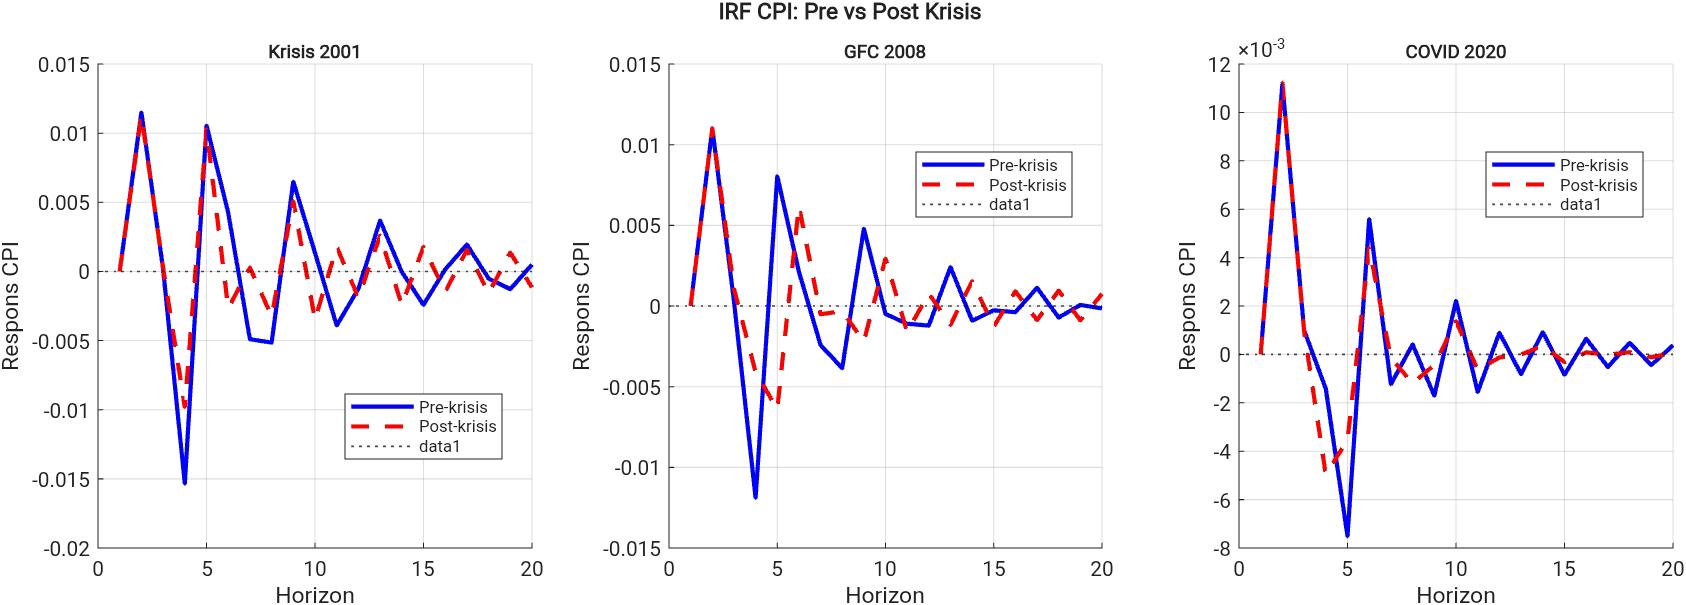


*Figure S3. Comparison of CPI IRF pre vs. Post crisis episodes (2001, 2008, 2020). Blue line: pre-crisis period; red dashed line: post-crisis period. The horizontal line indicates the baseline.*

**Figure S4. TV-FEVD Credible Bands – Respons CPI (t = 2012Q3)**


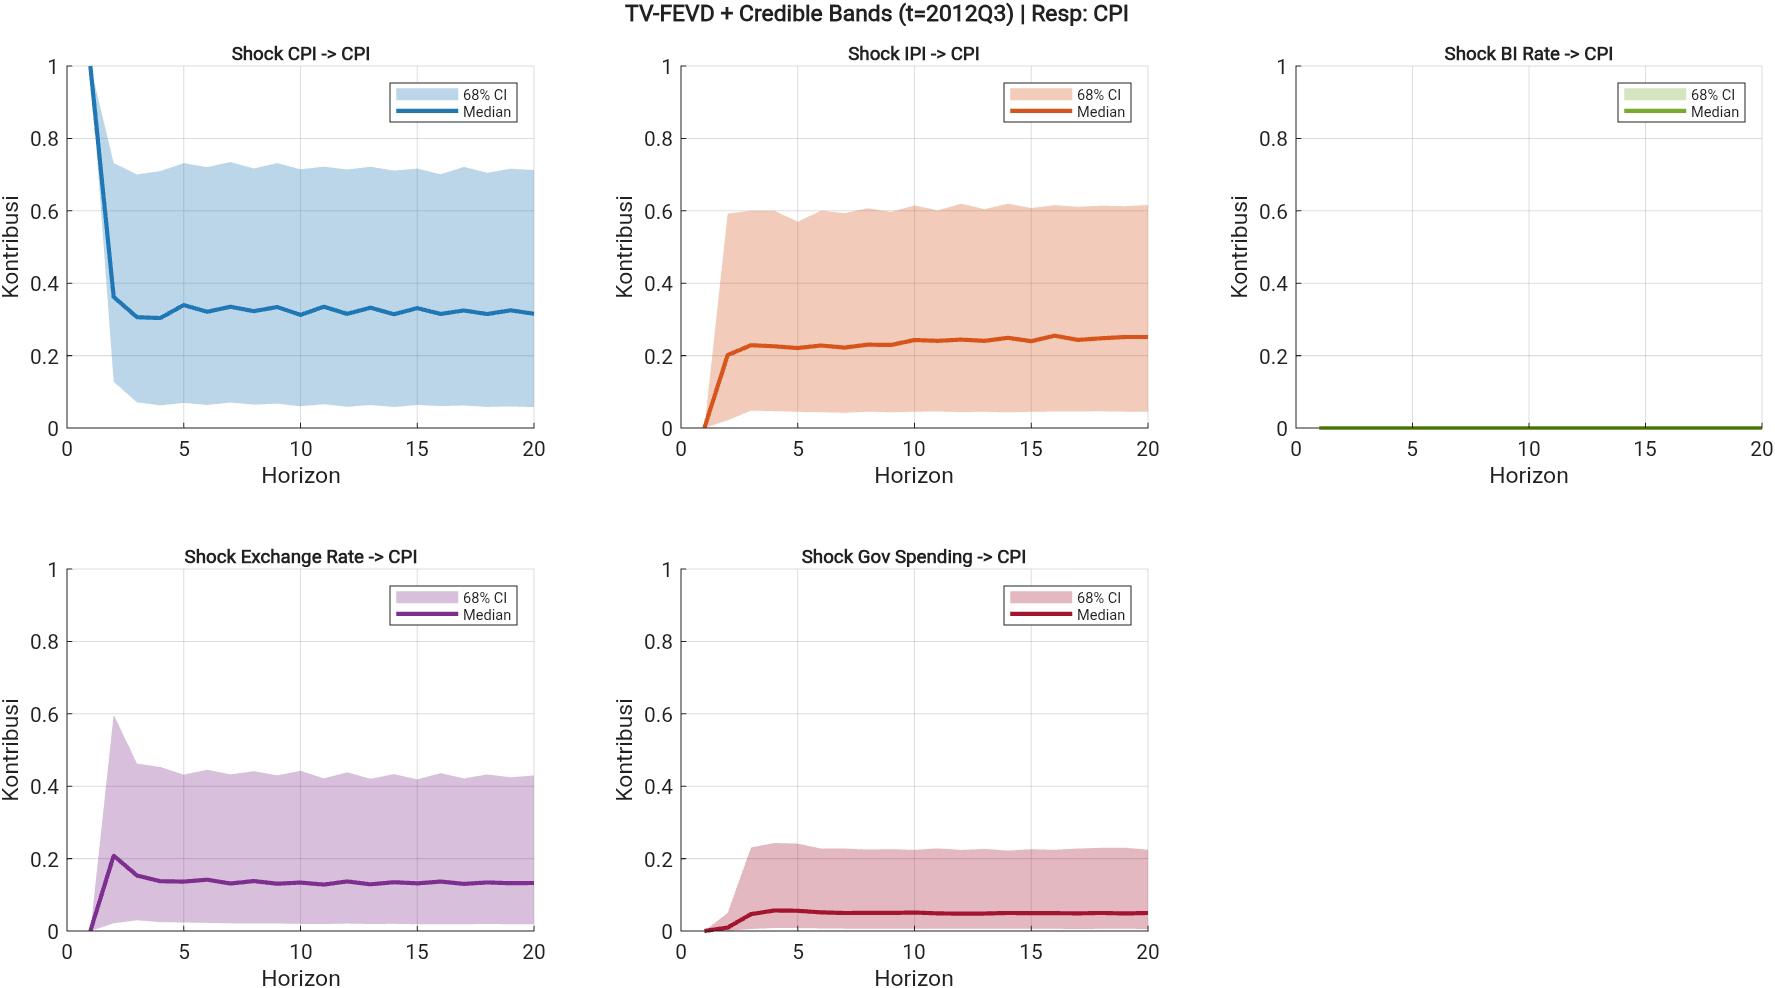


*Time-varying forecast error variance decomposition (TV-FEVD) with 68% credible intervals for each shock to CPI at the mid-sample period (2012Q3). The shaded area indicates estimation uncertainty (68% posterior credible interval); the solid line represents the posterior median. The horizontal axis shows the horizon in quarters (1–20); the vertical axis shows the relative contribution (0–1).*

***Note****: Credible intervals are computed from 10,000 posterior draws using Gibbs Sampling.g.*


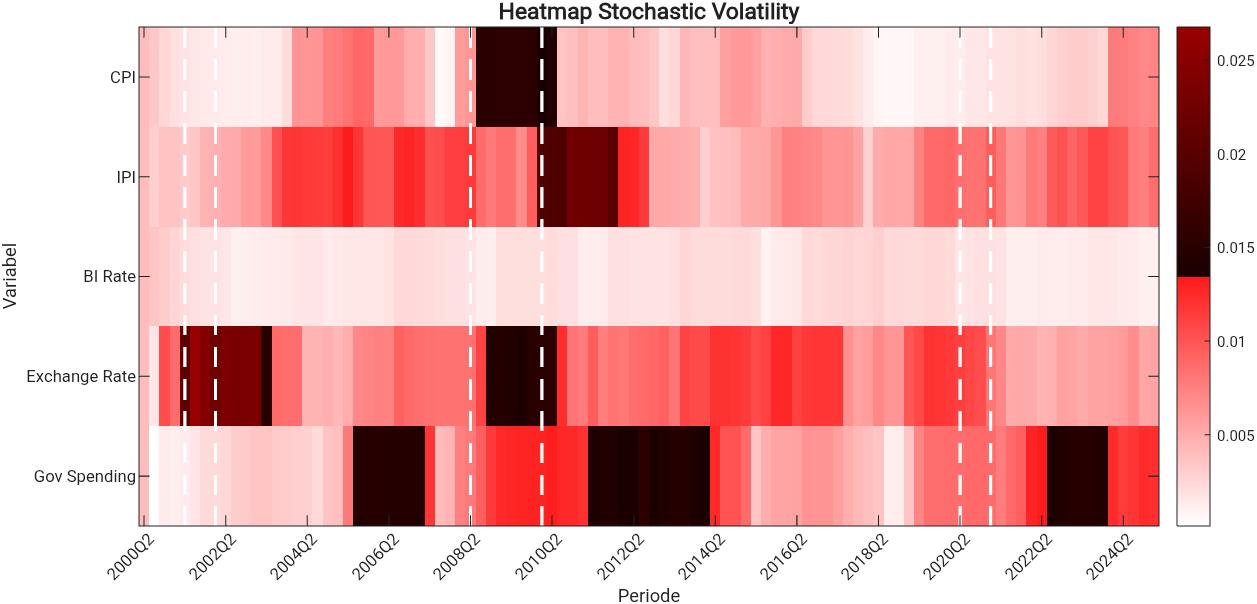
**Figure S5. Volatility Heatmap – All Variables**

*Rolling volatility proxy heatmap (rolling standard deviation, window = 8 quarters) for all macroeconomic variables over the sample period 2000Q1–2025Q1. Darker colors (dark red) indicate higher volatility; lighter colors indicate lower volatility. Vertical dashed lines mark major crisis episodes: 2001 (post-reform), 2008–09 (GFC), and 2020 (COVID-19).*

***Note****: The rolling volatility proxy is a descriptive representation and is not identical to the latent log-volatility estimated within the TVP-VAR-SV system.*

**Figure S6. Verifikasi Historical Decomposition (Actual vs HD Total)**


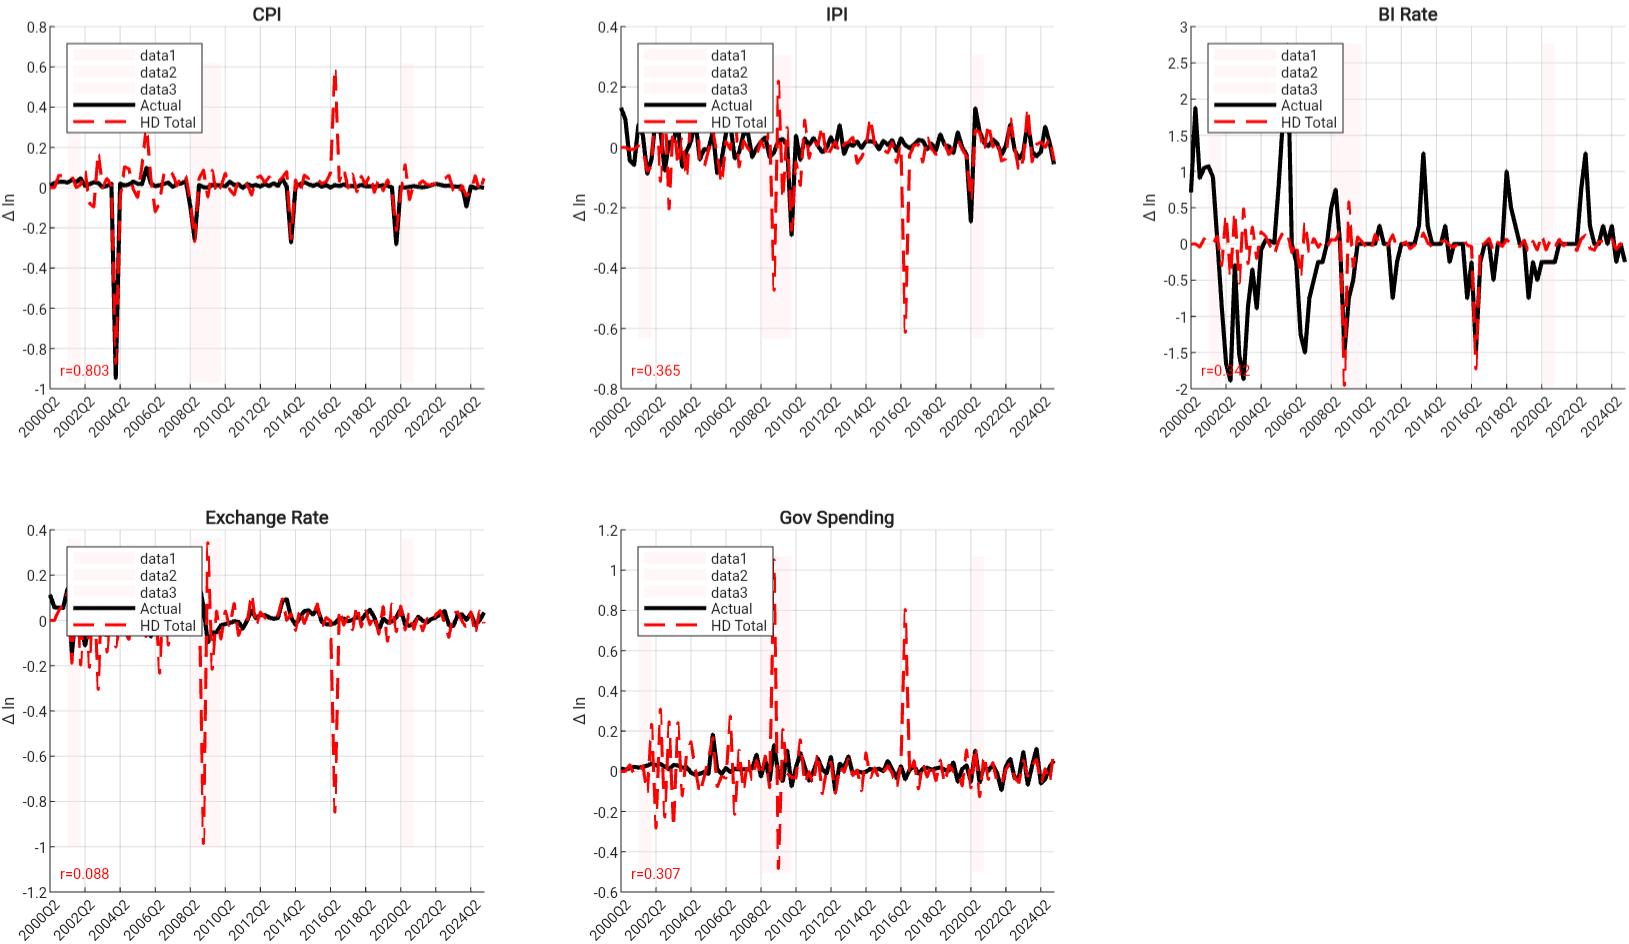


*Comparison between actual values (solid black line) and total historical decomposition (red dashed line) for all variables: CPI, IPI, BI Rate, Exchange Rate, and Government Spending. The Pearson correlation coefficient (r) between the actual and HD total is displayed in the lower-left corner of each panel.*

***Note****: r(CPI) = 0.800; r(IPI) = 0.365; r(Exchange Rate) = 0.088; r(Gov Spending) = 0.397. The lower fit for Exchange Rate and Gov Spending reflects the model’s limitations in capturing very short-run dynamics of more volatile variables.*

**Figure S7. Residual Diagnostics TVP-VAR-SV**


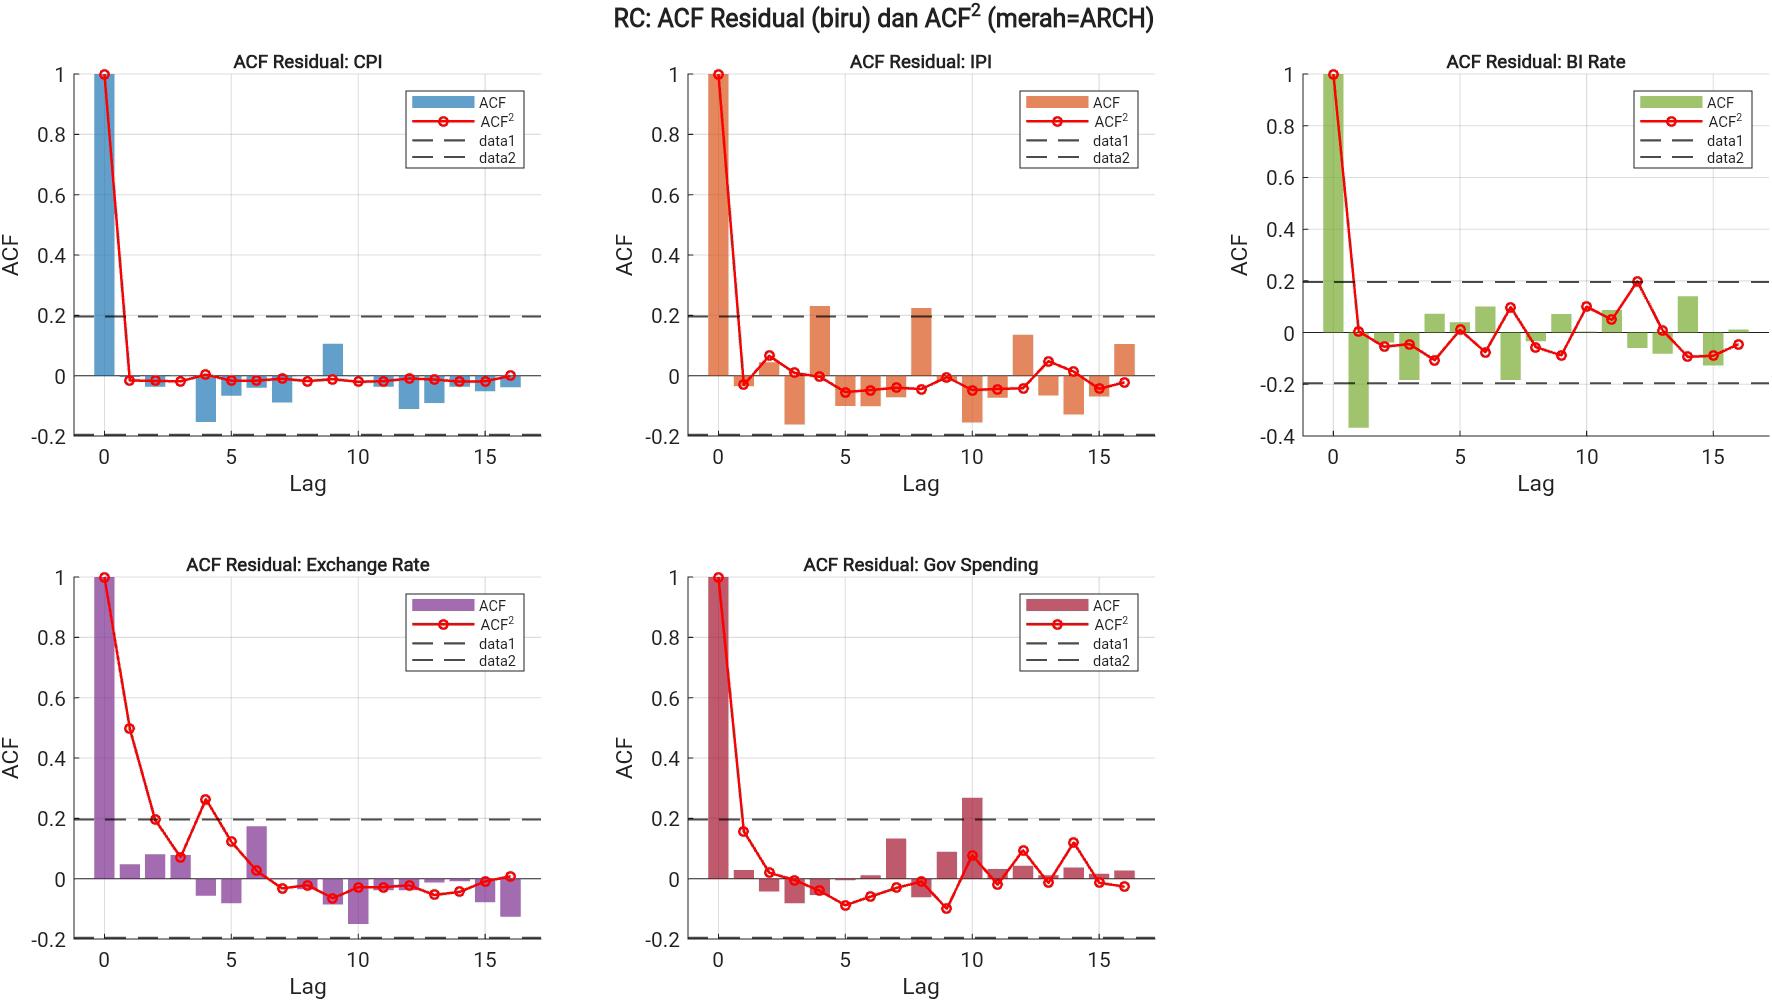
*i*

*Residual diagnostics for all variables in the TVP-VAR-SV system. Upper panel: ACF of residuals (blue bars) testing for remaining autocorrelation. Lower panel: ACF of squared residuals (red line, proxy for ARCH effects) testing for conditional heteroskedasticity. Horizontal dashed lines indicate the 5% significance bounds (±1.96/√T).*

***Note****: Ljung-Box Q-test: BI Rate exhibits residual autocorrelation (p = 0.001); CPI, IPI, Exchange Rate, and Government Spending show no significant autocorrelation. ARCH effects are detected in Exchange Rate (p = 0.000), consistent with the widely documented heteroskedasticity of exchange rates.*
